# Supplementary material for: NaKB6O9F2: a new complex alkali metal fluorooxoborate with puckered layers
Source: Royal Society of Chemistry journal article supplement (doi:10.1039/d0nj05124a), 2021-01-01
Supplement: d0nj05124a1.pdf [file d0nj05124a1.pdf]

## NaKB<sub>6</sub>O<sub>9</sub>F<sub>2</sub>: a new complex alkali metal fluorooxoborate with $\infty[\text{B}_6\text{O}_9\text{F}_2]^{2-}$ puckered layers

Zilong Chen, a Junwei Feng, b Bin a Dai, Feng Yu, a\*

a Key Laboratory for Green Processing of Chemical Engineering of Xinjiang Bingtuan,

School of Chemistry and Chemical Engineering, Shihezi University. Shihezi 832003, P. R. China.

b Department of Physics, Changji University. Changji, Xinjiang 831100, China.

\* Corresponding author: yufeng05@mail.ipc.ac.cn.

Table S1. Atomic coordinates ( $\times 10^4$ ), equivalent isotropic displacement parameters ( $\text{\AA}^2 \times 10^3$ ) and bond valence sums (BVS) for NaKB<sub>6</sub>O<sub>9</sub>F<sub>2</sub>. U(eq) is defined as one third of the trace of the orthogonalized  $U_{ij}$  tensor.

| Atoms | Wyck. | x/a      | y/b      | z/c      | U(eq) | BVS  |
|-------|-------|----------|----------|----------|-------|------|
| K(1)  | e     | -2959(1) | 7019(1)  | 2073(1)  | 29(1) | 0.93 |
| Na(1) | e     | 1841(1)  | 6410(1)  | 8872(1)  | 21(1) | 1.12 |
| B(1)  | e     | 408(3)   | 7988(2)  | 6029(3)  | 14(1) | 3.09 |
| B(2)  | e     | 6590(3)  | 10906(2) | 9157(3)  | 14(1) | 3.07 |
| B(3)  | e     | 2594(4)  | 9599(2)  | 6516(3)  | 17(1) | 3.07 |
| B(4)  | e     | 8178(4)  | 10643(2) | 11778(3) | 15(1) | 3.03 |
| B(5)  | e     | 8651(4)  | 9118(2)  | 10371(3) | 16(1) | 3.07 |
| B(6)  | e     | 4790(3)  | 11136(2) | 6530(3)  | 15(1) | 3.06 |
| O(1)  | e     | 1270(2)  | 8677(1)  | 5582(2)  | 17(1) | 2.16 |
| O(2)  | e     | 6997(2)  | 11346(1) | 10422(2) | 17(1) | 2.03 |
| O(3)  | e     | 499(2)   | 8352(1)  | 7186(2)  | 18(1) | 2.01 |
| O(4)  | e     | 2819(2)  | 9946(2)  | 7735(2)  | 19(1) | 1.93 |
| O(5)  | e     | 3490(2)  | 10080(2) | 6026(2)  | 24(1) | 2.04 |
| O(6)  | e     | -557(2)  | 6926(1)  | 5184(2)  | 20(1) | 2.15 |
| O(7)  | e     | 5506(2)  | 11620(1) | 7942(2)  | 15(1) | 2.10 |
| O(8)  | e     | 7359(2)  | 9744(2)  | 9120(2)  | 21(1) | 2.13 |
| O(9)  | e     | 9162(2)  | 9545(1)  | 11669(2) | 19(1) | 1.96 |
| F(1)  | e     | 3985(2)  | 12198(1) | 5562(2)  | 30(1) | 0.91 |
| F(2)  | e     | 6181(2)  | 10668(1) | 6454(2)  | 25(1) | 1.03 |

Table S2. Bond lengths [ $\text{\AA}$ ] and angles [ $^\circ$ ] for NaKB<sub>6</sub>O<sub>9</sub>F<sub>2</sub>.

|             |            |                    |           |
|-------------|------------|--------------------|-----------|
| K(1)-F(1)#1 | 2.611(2)   | O(6)-K(1)-O(4)#2   | 88.48(4)  |
| K(1)-O(7)#2 | 2.722(2)   | F(1)#1-K(1)-O(3)#4 | 73.11(6)  |
| K(1)-F(2)#3 | 2.788(2)   | O(7)#2-K(1)-O(3)#4 | 156.53(5) |
| K(1)-O(8)#3 | 2.8344(18) | F(2)#3-K(1)-O(3)#4 | 91.37(5)  |

|                    |            |                     |            |
|--------------------|------------|---------------------|------------|
| K(1)-O(6)          | 2.902(2)   | O(8)#3-K(1)-O(3)#4  | 107.16(5)  |
| K(1)-O(4)#2        | 3.060(2)   | O(6)-K(1)-O(3)#4    | 86.33(6)   |
| K(1)-O(3)#4        | 3.153(2)   | O(4)#2-K(1)-O(3)#4  | 96.74(4)   |
| Na(1)-F(2)#6       | 2.2112(19) | F(2)#6-Na(1)-O(1)#7 | 139.58(7)  |
| Na(1)-O(1)#7       | 2.3391(18) | F(2)#6-Na(1)-O(2)#8 | 97.21(7)   |
| Na(1)-O(2)#8       | 2.425(2)   | O(1)#7-Na(1)-O(2)#8 | 91.60(6)   |
| Na(1)-O(9)#3       | 2.463(2)   | F(2)#6-Na(1)-O(9)#3 | 96.79(8)   |
| Na(1)-O(5)#7       | 2.506(2)   | O(1)#7-Na(1)-O(9)#3 | 105.49(8)  |
| Na(1)-O(3)         | 2.509(2)   | O(2)#8-Na(1)-O(9)#3 | 133.22(6)  |
| B(1)-O(3)          | 1.344(3)   | F(2)#6-Na(1)-O(5)#7 | 83.81(7)   |
| B(1)-O(6)          | 1.363(3)   | O(1)#7-Na(1)-O(5)#7 | 56.21(6)   |
| B(1)-O(1)          | 1.372(3)   | O(2)#8-Na(1)-O(5)#7 | 109.61(8)  |
| B(2)-O(7)          | 1.352(3)   | O(9)#3-Na(1)-O(5)#7 | 116.15(8)  |
| B(2)-O(2)          | 1.353(3)   | F(2)#6-Na(1)-O(3)   | 101.96(6)  |
| B(2)-O(8)          | 1.383(3)   | O(1)#7-Na(1)-O(3)   | 115.63(6)  |
| B(3)-O(5)          | 1.345(3)   | O(2)#8-Na(1)-O(3)   | 56.80(7)   |
| B(3)-O(4)          | 1.346(3)   | O(9)#3-Na(1)-O(3)   | 76.67(7)   |
| B(3)-O(1)          | 1.399(3)   | O(5)#7-Na(1)-O(3)   | 165.54(7)  |
| B(4)-O(2)          | 1.457(3)   | O(3)-B(1)-O(6)      | 123.7(2)   |
| B(4)-O(4)#8        | 1.466(3)   | O(3)-B(1)-O(1)      | 122.3(2)   |
| B(4)-O(9)          | 1.486(3)   | O(6)-B(1)-O(1)      | 113.96(19) |
| B(4)-O(3)#8        | 1.489(3)   | O(7)-B(2)-O(2)      | 120.72(19) |
| B(5)-O(9)          | 1.351(3)   | O(7)-B(2)-O(8)      | 119.56(19) |
| B(5)-O(8)          | 1.367(3)   | O(2)-B(2)-O(8)      | 119.6(2)   |
| B(5)-O(6)#11       | 1.371(3)   | O(5)-B(3)-O(4)      | 127.0(2)   |
| B(6)-F(1)          | 1.401(3)   | O(5)-B(3)-O(1)      | 112.90(19) |
| B(6)-F(2)          | 1.425(3)   | O(4)-B(3)-O(1)      | 120.1(2)   |
| B(6)-O(7)          | 1.437(3)   | O(2)-B(4)-O(4)#8    | 111.79(19) |
| B(6)-O(5)          | 1.444(3)   | O(2)-B(4)-O(9)      | 111.97(17) |
| F(1)#1-K(1)-O(7)#2 | 104.35(6)  | O(4)#8-B(4)-O(9)    | 107.03(18) |
| F(1)#1-K(1)-F(2)#3 | 85.21(5)   | O(2)-B(4)-O(3)#8    | 105.70(17) |
| O(7)#2-K(1)-F(2)#3 | 111.84(6)  | O(4)#8-B(4)-O(3)#8  | 111.65(17) |
| F(1)#1-K(1)-O(8)#3 | 143.83(5)  | O(9)-B(4)-O(3)#8    | 108.73(19) |
| O(7)#2-K(1)-O(8)#3 | 88.71(6)   | O(9)-B(5)-O(8)      | 122.8(2)   |
| F(2)#3-K(1)-O(8)#3 | 58.69(5)   | O(9)-B(5)-O(6)#11   | 123.7(2)   |
| F(1)#1-K(1)-O(6)   | 158.89(6)  | O(8)-B(5)-O(6)#11   | 113.46(19) |
| O(7)#2-K(1)-O(6)   | 92.56(6)   | F(1)-B(6)-F(2)      | 105.83(18) |
| F(2)#3-K(1)-O(6)   | 100.33(4)  | F(1)-B(6)-O(7)      | 108.57(18) |
| O(8)#3-K(1)-O(6)   | 47.03(5)   | F(2)-B(6)-O(7)      | 111.20(19) |
| F(1)#1-K(1)-O(4)#2 | 89.23(4)   | F(1)-B(6)-O(5)      | 108.6(2)   |
| O(7)#2-K(1)-O(4)#2 | 59.80(5)   | F(2)-B(6)-O(5)      | 107.46(18) |
| F(2)#3-K(1)-O(4)#2 | 168.41(5)  | O(7)-B(6)-O(5)      | 114.79(18) |
| O(8)#3-K(1)-O(4)#2 | 125.79(5)  |                     |            |

Symmetry transformations used to generate equivalent atoms:

|                           |                          |                          |                         |
|---------------------------|--------------------------|--------------------------|-------------------------|
| #1 $-x, y-1/2, -z+1/2$    | #2 $-x, -y+2, -z+1$      | #3 $x-1, -y+3/2, z-1/2$  | #4 $x, -y+3/2, z-1/2$   |
| #5 $x-1, y, z-1$          | #6 $-x+1, y-1/2, -z+3/2$ | #7 $x, -y+3/2, z+1/2$    | #8 $-x+1, -y+2, -z+2$   |
| #9 $-x, -y+1, -z+1$       | #10 $x+1, y, z+1$        | #11 $x+1, -y+3/2, z+1/2$ | #12 $-x, y+1/2, -z+1/2$ |
| #13 $-x+1, y+1/2, -z+3/2$ |                          |                          |                         |

Table S3. The investigation of the reported inorganic fluorooxoborate

|    | Compounds                                                                | Space groups |                                                                                | FBB                                                                                  | Anionic framework                                                                                  | Rfes     |
|----|--------------------------------------------------------------------------|--------------|--------------------------------------------------------------------------------|--------------------------------------------------------------------------------------|----------------------------------------------------------------------------------------------------|----------|
| 1  | $\text{Na}_3\text{B}_3\text{O}_3\text{F}_6$                              | $C2/c$       | $\text{BO}_2\text{F}_2$                                                        | $\text{B}_3\text{O}_3\text{F}_6$                                                     | $[\text{B}_3\text{O}_3\text{F}_6]$ cluster                                                         | [1]      |
| 2  | $\text{K}_3\text{B}_3\text{O}_3\text{F}_6$                               | $P2_1/n$     | $\text{BO}_2\text{F}_2$                                                        | $\text{B}_3\text{O}_3\text{F}_6$                                                     | $[\text{B}_3\text{O}_3\text{F}_6]$ cluster                                                         | [2]      |
| 3  | $\text{K}_{0.42}\text{Rb}_{2.58}\text{B}_3\text{O}_3\text{F}_6$          | $Pbcn$       | $\text{BO}_2\text{F}_2$                                                        | $\text{B}_3\text{O}_3\text{F}_6$                                                     | $[\text{B}_3\text{O}_3\text{F}_6]$ cluster                                                         | [3]      |
| 4  | $\text{Cs}_{1.29}\text{Rb}_{1.71}\text{B}_3\text{O}_3\text{F}_6$         | $P2_1/c$     | $\text{BO}_2\text{F}_2$                                                        | $\text{B}_3\text{O}_3\text{F}_6$                                                     | $\text{B}_3\text{O}_3\text{F}_6$ cluster                                                           | [3]      |
| 5  | $\text{Na}_{0.76}\text{Rb}_{2.24}\text{B}_3\text{O}_3\text{F}_6$         | $P2_1/c$     | $\text{BO}_2\text{F}_2$                                                        | $\text{B}_3\text{O}_3\text{F}_6$                                                     | $\text{B}_3\text{O}_3\text{F}_6$ cluster                                                           | [3]      |
| 6  | $\text{K}_{2.64}\text{Cs}_{0.36}\text{B}_3\text{O}_3\text{F}_6$          | $P2_1/c$     | $\text{BO}_2\text{F}_2$                                                        | $\text{B}_3\text{O}_3\text{F}_6$                                                     | $\text{B}_3\text{O}_3\text{F}_6$ cluster                                                           | [3]      |
| 7  | $\text{K}_{1.66}\text{Rb}_{1.34}\text{B}_3\text{O}_3\text{F}_6$          | $P2_1/c$     | $\text{BO}_2\text{F}_2$                                                        | $\text{B}_3\text{O}_3\text{F}_6$                                                     | $\text{B}_3\text{O}_3\text{F}_6$ cluster                                                           | [3]      |
| 8  | $\text{KCs}_2\text{B}_3\text{O}_3\text{F}_6$                             | $P2_1/c$     | $\text{BO}_2\text{F}_2$                                                        | $\text{B}_3\text{O}_3\text{F}_6$                                                     | $\text{B}_3\text{O}_3\text{F}_6$ cluster                                                           | [3]      |
| 9  | $\text{Rb}_3\text{B}_3\text{O}_3\text{F}_6$                              | $Pbcn$       | $\text{BO}_2\text{F}_2$                                                        | $\text{B}_3\text{O}_3\text{F}_6$                                                     | $\text{B}_3\text{O}_3\text{F}_6$ cluster                                                           | [3]      |
| 10 | $\text{K}_2\text{RbB}_3\text{O}_3\text{F}_6$                             | $P2_1/c$     | $\text{BO}_2\text{F}_2$                                                        | $\text{B}_3\text{O}_3\text{F}_6$                                                     | $\text{B}_3\text{O}_3\text{F}_6$ cluster                                                           | [3]      |
| 11 | $\text{Cs}_3\text{B}_3\text{O}_3\text{F}_6$                              | $Pbcn$       | $\text{BO}_2\text{F}_2$                                                        | $\text{B}_3\text{O}_3\text{F}_6$                                                     | $\text{B}_3\text{O}_3\text{F}_6$ cluster                                                           | [4]      |
| 12 | $\text{K}_{10}\text{B}_{13}\text{O}_{15}\text{F}_{19}$                   | $R3m$        | $\text{BO}_3, \text{BO}_2\text{F}_2$<br>$\text{BO}_3\text{F}$                  | $\text{B}_{10}\text{O}_{12}\text{F}_{13}$<br>and<br>$\text{B}_3\text{O}_3\text{F}_6$ | $\text{B}_{10}\text{O}_{12}\text{F}_{13}$ and<br>$\text{B}_{10}\text{O}_{12}\text{F}_{13}$ cluster | [5]      |
| 13 | $\text{Rb}_{10}\text{B}_{13}\text{O}_{15}\text{F}_{19}$                  | $R3m$        | $\text{BO}_3, \text{BO}_2\text{F}_2$<br>$\text{BO}_3\text{F}$                  | $\text{B}_{10}\text{O}_{12}\text{F}_{13}$<br>and<br>$\text{B}_3\text{O}_3\text{F}_6$ | $\text{B}_{10}\text{O}_{12}\text{F}_{13}$ and<br>$\text{B}_{10}\text{O}_{12}\text{F}_{13}$ cluster | [5]      |
| 14 | $\text{Ba}(\text{B}_2\text{OF}_3(\text{OH}))_2$                          | $C2/m$       | $\text{BOF}_2$<br>$\text{BO}(\text{OH})_2$                                     | $\text{B}_2\text{OF}_3(\text{OH})_2$                                                 | $[\text{B}_2\text{OF}_3(\text{OH})]$<br>cluster                                                    | [6]      |
| 15 | $\text{BaBO}_3\text{F}$                                                  | $Pnma$       | $\text{BO}_2\text{F}_2$                                                        | $\text{BO}_2\text{F}_2$                                                              | $[\text{BOF}_3]$ chain                                                                             | [7]      |
| 16 | $\text{Li}_2\text{B}_3\text{O}_4\text{F}_3$                              | $P2_12_12_1$ | $\text{BO}_3, \text{BO}_3\text{F}$<br>$\text{BO}_2\text{F}_2$                  | $\text{B}_3\text{O}_5\text{F}_3$                                                     | $[\text{B}_3\text{O}_4\text{F}_3]$ chain                                                           | [8]      |
| 17 | $\text{BiB}_2\text{O}_4\text{F}$                                         | $P3_2$       | $\text{BO}_4, \text{BO}_3\text{F}$                                             | $\text{B}_2\text{O}_6\text{F}$                                                       | $[\text{B}_2\text{O}_4\text{F}]$ chain                                                             | [9]      |
| 18 | $\text{K}_3\text{B}_6\text{O}_9\text{F}_3$                               | $P2_1/c$     | $\text{BO}_3, \text{BO}_4$<br>$\text{BO}_2\text{F}_2$<br>$\text{BO}_3\text{F}$ | $\text{B}_6\text{O}_{11}\text{F}_3$                                                  | $[\text{B}_6\text{O}_9\text{F}_3]$ layer                                                           | [10]     |
| 19 | $\text{Li}_2\text{Na}_{0.9}\text{K}_{0.1}\text{B}_5\text{O}_8\text{F}_2$ | $Pbca$       | $\text{BO}_3, \text{BO}_2\text{F}_2$<br>$\text{BO}_3\text{F}$                  | $\text{B}_5\text{O}_{10}\text{F}_2$                                                  | $[\text{B}_5\text{O}_8\text{F}_2]$ layer                                                           | [11]     |
| 20 | $\text{BaB}_2\text{O}_3\text{F}_2$                                       | $P2_1$       | $\text{BO}_4, \text{BO}_3\text{F}$                                             | $\text{B}_2\text{O}_6\text{F}$                                                       | $[\text{B}_2\text{O}_3\text{F}]$ layer                                                             | [12]     |
| 21 | $\text{SnB}_2\text{O}_3\text{F}_2$                                       | $P3_1m$      | $\text{BO}_3\text{F}$                                                          | $\text{B}_2\text{O}_5\text{F}_2$                                                     | $[\text{B}_2\text{O}_3\text{F}]$ layer                                                             | [13, 14] |
| 22 | $\text{PbB}_2\text{O}_3\text{F}_2$                                       | $P3_1m$      | $\text{BO}_3\text{F}$                                                          | $\text{B}_2\text{O}_5\text{F}_2$                                                     | $[\text{B}_6\text{O}_{12}\text{F}_6]$ layer                                                        | [14]     |
| 23 | $\text{KNiB}_4\text{O}_6\text{F}_3$                                      | $P2_1/c$     | $\text{BO}_3, \text{BO}_3\text{F}$                                             | $\text{B}_4\text{O}_6\text{F}_4$                                                     | $[\text{B}_3\text{O}_6\text{F}_3]$ layer                                                           | [15]     |
| 24 | $\text{Na}_2\text{B}_6\text{O}_9\text{F}_2$                              | $P2_1/c$     | $\text{BO}_3, \text{BO}_3\text{F}$                                             | $\text{B}_6\text{O}_{11}\text{F}_2$                                                  | $[\text{B}_6\text{O}_9\text{F}_2]$ layer                                                           | [16]     |
| 25 | $\text{NaKB}_6\text{O}_9\text{F}_2$                                      | $P2_1/n$     | $\text{BO}_3, \text{BO}_4$<br>$\text{BO}_2\text{F}_2$                          | $\text{B}_6\text{O}_{11}\text{F}_2$                                                  | $[\text{B}_6\text{O}_9\text{F}_2]$ layer                                                           |          |
| 26 | $\text{NaRbB}_6\text{O}_9\text{F}_2$                                     | $P2_1/n$     | $\text{BO}_3, \text{BO}_4$                                                     | $\text{B}_6\text{O}_{11}\text{F}_2$                                                  | $[\text{B}_6\text{O}_9\text{F}_2]$ layer                                                           | [17]     |

|    |                                                                      |                         |                                                                     |                                               |                                                             |         |
|----|----------------------------------------------------------------------|-------------------------|---------------------------------------------------------------------|-----------------------------------------------|-------------------------------------------------------------|---------|
| 27 | Ba <sub>3</sub> B <sub>10</sub> O <sub>17</sub> F <sub>2</sub> 0.1KF | $P\bar{1}$              | BO <sub>2</sub> F <sub>2</sub><br>BO <sub>3</sub> , BO <sub>4</sub> | B <sub>10</sub> O <sub>22</sub> F             | B <sub>10</sub> O <sub>16</sub> F layer                     | [18]    |
| 28 | NaB <sub>4</sub> O <sub>6</sub> F                                    | <i>C2</i>               | BO <sub>3</sub> , BO <sub>3</sub> F                                 | B <sub>4</sub> O <sub>8</sub> F               | [B <sub>4</sub> O <sub>6</sub> F] layer                     | [19]    |
| 29 | RbB <sub>4</sub> O <sub>6</sub> F                                    | <i>Pna2<sub>1</sub></i> | BO <sub>3</sub> , BO <sub>3</sub> F                                 | B <sub>4</sub> O <sub>8</sub> F               | [B <sub>4</sub> O <sub>6</sub> F] layer                     | [20]    |
| 30 | CsB <sub>4</sub> O <sub>6</sub> F                                    | <i>Pna2<sub>1</sub></i> | BO <sub>3</sub> , BO <sub>3</sub> F                                 | B <sub>4</sub> O <sub>8</sub> F               | [B <sub>4</sub> O <sub>6</sub> F] layer                     | [21]    |
| 31 | NH <sub>4</sub> B <sub>4</sub> O <sub>6</sub> F                      | <i>Pna2<sub>1</sub></i> | BO <sub>3</sub> , BO <sub>3</sub> F                                 | B <sub>4</sub> O <sub>8</sub> F               | [B <sub>4</sub> O <sub>6</sub> F] layer                     | [22]    |
| 32 | CaB <sub>4</sub> O <sub>6</sub> F <sub>2</sub>                       | $P\bar{1}$              | BO <sub>3</sub> , BO <sub>3</sub> F                                 | B <sub>4</sub> O <sub>8</sub> F               | [B <sub>4</sub> O <sub>6</sub> F <sub>2</sub> ] layer       | [23]    |
| 33 | SrB <sub>4</sub> O <sub>6</sub> F <sub>2</sub>                       | $P\bar{1}$              | BO <sub>3</sub> , BO <sub>3</sub> F                                 | B <sub>4</sub> O <sub>8</sub> F               | [B <sub>4</sub> O <sub>6</sub> F <sub>2</sub> ] layer       | [24]    |
| 34 | BaB <sub>4</sub> O <sub>6</sub> F <sub>2</sub>                       | <i>P2<sub>1</sub>/n</i> | BO <sub>3</sub> , BO <sub>3</sub> F                                 | B <sub>4</sub> O <sub>8</sub> F               | [B <sub>4</sub> O <sub>6</sub> F <sub>2</sub> ] layer       | [23]    |
| 35 | CsRbB <sub>8</sub> O <sub>12</sub> F <sub>2</sub>                    | $P\bar{6}2c$            | BO <sub>3</sub> , BO <sub>3</sub> F                                 | B <sub>4</sub> O <sub>8</sub> F               | [B <sub>4</sub> O <sub>6</sub> F] layer                     | [20]    |
| 36 | CsKB <sub>8</sub> O <sub>12</sub> F <sub>2</sub>                     | <i>P321</i>             | BO <sub>3</sub> , BO <sub>3</sub> F                                 | B <sub>4</sub> O <sub>8</sub> F               | [B <sub>4</sub> O <sub>6</sub> F] layer                     | [20]    |
| 37 | CaB <sub>5</sub> O <sub>7</sub> F <sub>3</sub>                       | <i>Cmc2<sub>1</sub></i> | BO <sub>3</sub> , BO <sub>3</sub> F                                 | B <sub>5</sub> O <sub>9</sub> F <sub>3</sub>  | [B <sub>5</sub> O <sub>7</sub> F <sub>3</sub> ] layer       | [24,25] |
| 38 | SrB <sub>5</sub> O <sub>7</sub> F <sub>3</sub>                       | <i>Cmc2<sub>1</sub></i> | BO <sub>3</sub> , BO <sub>3</sub> F                                 | B <sub>5</sub> O <sub>9</sub> F <sub>3</sub>  | [B <sub>5</sub> O <sub>7</sub> F <sub>3</sub> ] layer       | [25,26] |
| 39 | PbB <sub>5</sub> O <sub>7</sub> F <sub>3</sub>                       | <i>Cmc2<sub>1</sub></i> | BO <sub>3</sub> , BO <sub>3</sub> F                                 | B <sub>5</sub> O <sub>9</sub> F <sub>3</sub>  | [B <sub>5</sub> O <sub>7</sub> F <sub>3</sub> ] layer       | [27]    |
| 40 | LiB <sub>6</sub> O <sub>9</sub> F                                    | <i>Pna2<sub>1</sub></i> | BO <sub>3</sub> , BO <sub>3</sub> F                                 | B <sub>6</sub> O <sub>11</sub> F              | [B <sub>6</sub> O <sub>9</sub> F] layer                     | [28]    |
| 41 | BaB <sub>8</sub> O <sub>18</sub> F <sub>2</sub>                      | $\bar{R}3c$             | BO <sub>3</sub> , BO <sub>3</sub> F                                 | B <sub>4</sub> O <sub>8</sub> F               | [B <sub>6</sub> O <sub>6</sub> F <sub>2</sub> ] layer       | [29]    |
| 42 | Na <sub>3</sub> B <sub>7</sub> O <sub>11</sub> F <sub>2</sub>        | <i>Pnma</i>             | BO <sub>3</sub> , BO <sub>4</sub>                                   | B <sub>7</sub> O <sub>13</sub> F <sub>2</sub> | [B <sub>7</sub> O <sub>13</sub> F <sub>2</sub> ]<br>network | [30]    |
| 43 | Li <sub>2</sub> B <sub>6</sub> O <sub>9</sub> F <sub>2</sub>         | <i>Cc</i>               | BO <sub>3</sub> , BO <sub>4</sub>                                   | B <sub>6</sub> O <sub>11</sub> F <sub>2</sub> | [B <sub>6</sub> O <sub>9</sub> F <sub>2</sub> ] network     | [31]    |
| 44 | PbB <sub>5</sub> O <sub>8</sub> F                                    | <i>Pbca</i>             | BO <sub>3</sub> , BO <sub>4</sub>                                   | B <sub>5</sub> O <sub>10</sub> F              | [B <sub>5</sub> O <sub>8</sub> F <sub>3</sub> ] network     | [32]    |
| 45 | BaB <sub>5</sub> O <sub>8</sub> F xH <sub>2</sub> O                  | <i>Pbca</i>             | BO <sub>3</sub> , BO <sub>4</sub>                                   | B <sub>5</sub> O <sub>10</sub> F              | [B <sub>5</sub> O <sub>8</sub> F <sub>3</sub> ] network     | [33]    |

Table S4. The birefringence of some borates and fluorooxoborates with fixed 3D B-O/F network structures.

|    |                                                               |                                   |         |
|----|---------------------------------------------------------------|-----------------------------------|---------|
| 1  | LBO                                                           | 0.040 @ 1064 nm                   | [34]    |
| 2  | CBO                                                           | 0.059 @ 1064 nm                   | [34]    |
| 3  | CLBO                                                          | 0.049 @ 1064 nm                   | [34]    |
| 4  | K <sub>3</sub> B <sub>6</sub> O <sub>10</sub> Cl              | 0.048 @ 589.3 nm                  | [35]    |
| 5  | K <sub>3</sub> B <sub>6</sub> O <sub>10</sub> Br              | 0.046 @ 1064 nm                   | [36]    |
| 6  | NaKB <sub>6</sub> O <sub>9</sub> F <sub>2</sub>               | 0.096 @ 193 nm<br>0.053 @ 1064 nm | —       |
| 7  | Na <sub>3</sub> B <sub>7</sub> O <sub>11</sub> F <sub>2</sub> | 0.083 @ 193 nm                    | [30]    |
| 8  | Li <sub>2</sub> B <sub>6</sub> O <sub>9</sub> F <sub>2</sub>  | 0.07 @ 1064 nm                    | [31,37] |
| 9  | PbB <sub>5</sub> O <sub>8</sub> F                             | 0.0685 @ 1064 nm                  | [32]    |
| 10 | BaB <sub>5</sub> O <sub>8</sub> F xH <sub>2</sub> O           | 0.093 @ 193 nm                    | [33]    |

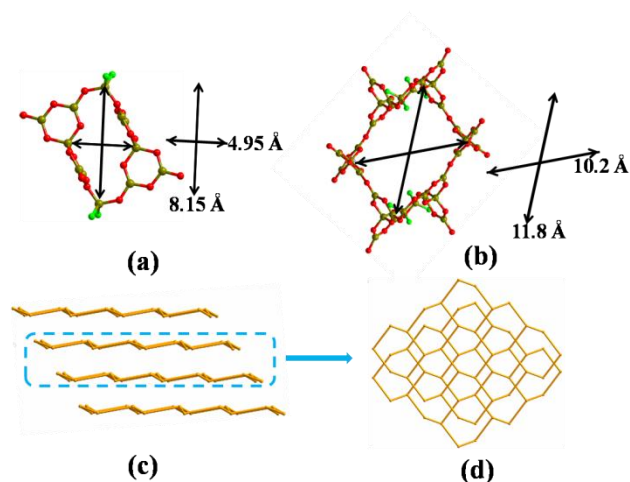

Figure S1. The 16-member ring(a) and super large rectangular ring in the puckered layers; (c), (d) is the topological model of  $\text{NaKB}_6\text{O}_9\text{F}_2$  (The Schläfli symbol, as analyzed by the TOPOS 4.0 program, is  $\{6^3\}$ ).

## References

1. G. Cakmak, T. Pilz, M. Jansen, *Z. Anorg. Allg. Chem.*, 2012, **638**, 1411-1415.
2. H. P. Wu, H. W. Yu, Q. Bian, Z. H. Yang, S. J. Han, S. L. Pan, *Inorg. Chem.*, 2014, **53**, 12686-8.
3. W. Y. Zhang, Z. L. Wei, Z. H. Yang, S. L. Pan, *Inorg. Chem.*, 2019, **58**, 13411-13417.
4. W. Y. Zhang, Z. L. Wei, Z. H. Yang, S. L. Pan, *Inorg. Chem.*, 2020, **59**, 3274-3280.
5. M. Q. Gai, Y. Wang, T. H. Tong, L. Y. Wang, Z. H. Yang, X. Zhou, S. L. Pan, *Chem. Commun.*, 2020, **56**, 3301-3304.
6. D. Q. Jiang, Y. Wang, H. Li, Z. H. Yang, S. L. Pan, *Dalton. Trans.*, 2018, **47**, 5157-5160.
7. T. Pilz, H. Nuss, M. Jansen, *J. Solid State Chem.*, 2012, **186**, 104-108.
8. R. H. Cong, Y. Wang, L. Kang, Z. Y. Zhou, Z. H. Lin, T. Yang, *Inorg. Chem. Front.*, 2015, **2**, 170-176.
9. G. P. Han, G. Q. Shi, Y. Wang, B. B. Zhang, S. J. Han, F. F. Zhang, Z. H. Yang, S. L. Pan, *Chem. Eur. J.*, 2018, **24**, 4497-4502.
10. S. J. Han, Y. Wang, B. B. Zhang, Z. H. Yang, S. L. Pan, *Inorg. Chem.*, 2018, **57**, 873-878.
11. M. Cheng, W. Q. Jin, Z. H. Yang, S. L. Pan, *Inorg. Chem.*, 2020, DOI: 10.1021/acs.inorgchem.0c02213.
12. C. M. Huang, F. F. Zhang, H. Li, Z. H. Yang, H. W. Yu, S. L. Pan, *Chem. Eur. J.*, 2019, **25**, 6693-6697.
13. S. G. Jantz, M. Dialer, L. Bayarjargal, B. Winkler, van L. Wullen, F. Pielhofer, J. Brgoch, R. Wehrich, H. A. Hoppe, *Adv. Opt. Mater.*, 2018, **6**, 1800497.
14. M. Luo, F. Liang, Y. Song, D. Zhao, N. Ye, Z. Lin, *J. Am. Chem. Soc.*, 2018, **140**, 6814-6817.
15. C. Tao, R. K. Li, *Eur. J.*, 2020, **26**, 3709-3712.
16. G. Q. Shi, F. F. Zhang, B. B. Zhang, D. W. Hou, X. L. Chen, Z. H. Yang, S. L. Pan, *Inorg. Chem.*, 2017, **56**, 344-350.
17. S. J. Han, B. B. Zhang, Z. H. Yang, S. L. Pan, *Chem. Eur. J.*, 2018, **24**, 10022-10027.
18. Y. H. Li, H. W. Yu, G. P. Han, H. Li, Z. H. Yang, S. L. Pan, *Chem. Commun.*, 2019, **55**,

8923-8926.

19. Z. Z. Zhang, Y. Wang, B. B. Zhang, Z. H. Yang, S. L. Pan, *Angew. Chem. Int. Ed. Engl.*, 2018, **57**, 6577-6581.
20. Y. Wang, B. B. Zhang, Y. Z. H. ang, S. L. Pan, *Angew. Chem. Int. Ed.*, 2018, **57**, 2150-2154.
21. X. F. Wang, Y. Wang, B. B. Zhang, F. F. Zhang, Z. H. Yang, S. L. Pan, *Angew. Chem. Int. Ed. Engl.*, 2017, **56**, 14119-14123.
22. G. Q. Shi, Y. Wang, F. F. Zhang, B. B. Zhang, Z. H. Yang, X. Hou, S. L. Pan, K. R. Poeppelmeier, *J. Am. Chem. Soc.*, 2017, **139**, 10645-10648.
23. Z. Z. Zhang, Y. Wang, B. B. Zhang; H. Z. Yang, S. L. Pan, *Chem. Eur. J.*, 2018, **24**, 11267-11272.
24. Z. Z. Zhang, Y. Wang, B. B. Zhang, Z. H. Yang, S. L. Pan, *Inorg. Chem.*, 2018, **57**, 4820-4823.
25. M. Luo, F. Liang, Y. Song, D. Zhao, N. Ye, Z. Lin, *J. Am. Chem. Soc.*, 2018, **140**, 6814-6817.
26. M. Mutailipu, M. Zhang, B. B. Zhang, L. Y. Wang, Z. H. Yang, X. Zhou, S. L. Pan, *Angew. Chem. Int. Ed.*, 2018, **57**, 6095-6099.
27. S. J. Han, M. Mutailipu, A. Tudi, Z. H. Yang, S. L. Pan, *Chem. Mater.*, 2020, **32**, 2172-2179.
28. G. Cakmak, J. Nuss, M. Jansen, *Z. Anorg. Allg. Chem.*, 2009, **635**, 631-636.
29. Z. Z. Zhang, Y. Wang, H. Li, Z. H. Yang, S. L. Pan, *Inorg. Chem. Front.*, 2019, **6**, 546-549.
30. C. C. Tang, X. X. Jiang, W. L. Yin, L. J. Liu, M. J. Xia, Q. Huang, G. M. Song, X. Y. Wang, Z. S. Lin, C. T. Chen, *Dalton Trans.*, 2019, **48**, 21-24.
31. T. Pilz, M. Jansen, *Z. Anorg. Allg. Chem.*, 2011, **637**, 2148-2152
32. M. Mutailipu, M. Zhang, B. B. Zhang, Z. H. Yang, S. L. Pan, *Chem. Commun.*, 2018, **54**, 6308-6311.
33. C. M. Huang, G. P. Han, H. Li, F. F. Zhang, Z. H. Yang, S. L. Pan, *Dalton. Trans.*, 2019, **48**, 6714-6717.
34. C. Chen, T. Sasaki, R. Li, Y. Wu, Z. Lin, Y. Mori, Z. Hu, J. Wang, S. Uda, M. Yoshimura, Y. Kaneda, *Nonlinear Optical Borate Crystals*, Wiley-VCH Verlag & Co. KGaA, Boschstr. 12, 69469 Weinheim, Germany, 2012
35. H. Wu, S. Pan, H. Yu, D. Jia, A. Chang, H. Li, F. Zhang, X. Huang, *CrystEng Comm.* 2012, **14**, 799-799d.
36. M. Zhang, X. Su, S. Pan, Z. Wang, H. Zhang, Z. Yang, B. Zhang, L. Dong, Y. Wang, F. Zhang, Y. Yang, *J. Phys. Chem. C* 2014, **118**, 11849-11856.
37. B. B. Zhang, G. Q. Shi, Z. H. Yang, F. F. Zhang, S. L. Pan, *Angew. Chem. Int. Edit.*, 2017, **56**, 3916-3919.
